# Supplementary material
Source: MDPI journal article supplement (https://www.mdpi.com/2073-4441/9/3/176)
Supplement: s1 [file s1]

# Supplementary Materials: Linking Forest Cover to Water Quality: A Multivariate Analysis of Large Monitoring Datasets

Delphine Brogna, Adrien Michez, Sander Jacobs, Marc Dufrêne, Caroline Vincke and Nicolas Dendoncker

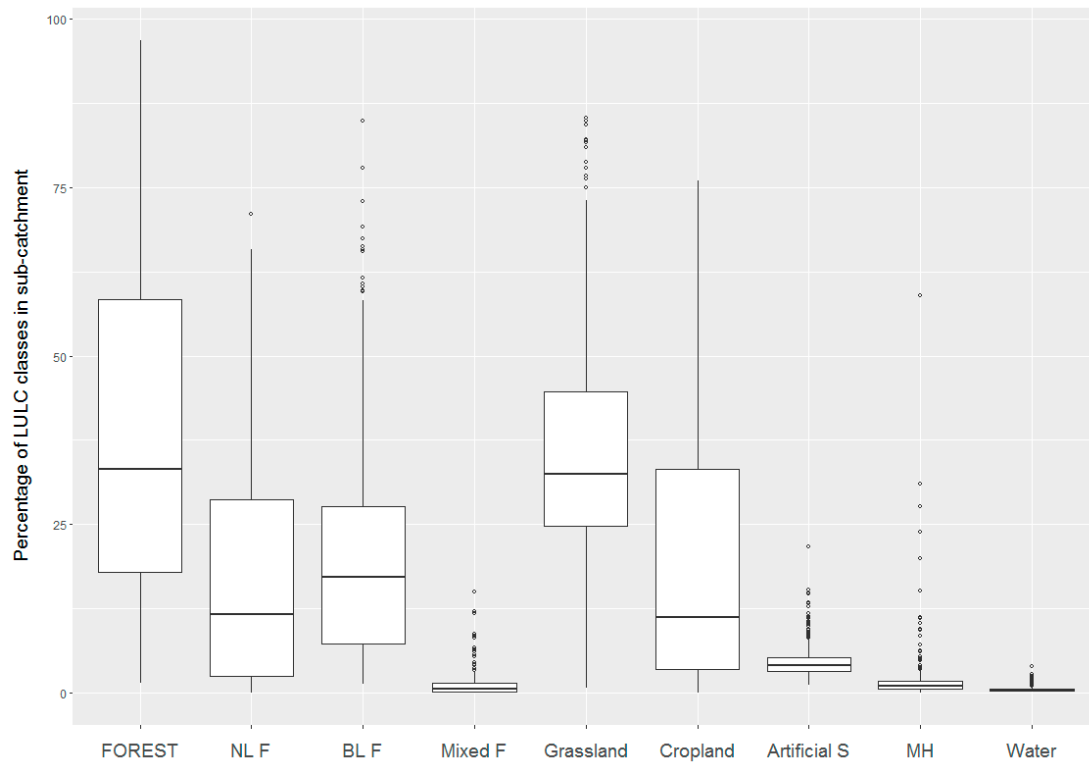

**Figure S1.** LULC percentages in the sub-catchments with NL F needle-leaved forest, BL F: broad-leaved forest, S: Surfaces and MH: shrubs–heathlands and moorlands.
